# Supplementary material
Source: PubMed Central journal article supplement (PMC3389977)
Supplement: supp_112.140483_TableS3.pdf [file supp_112.140483_TableS3.pdf]

**Table S3 Primers used in this study**

| <b>Primers</b> | <b>Purpose</b>                 | <b>Sequence</b>                           |
|----------------|--------------------------------|-------------------------------------------|
| Mfm1-1         | For mutagenesis by Quik-Change | ccgtaagaatNNNaccccaaggttccttacatgtggaag   |
| Mfm1-2         | For mutagenesis by Quik-Change | ccgtaagaattatNNNccaaggttccttacatgtggaag   |
| Mfm1-3         | For mutagenesis by Quik-Change | ccgtaagaattataccNNNaaggttccttacatgtggaag  |
| Mfm1-4         | For mutagenesis by Quik-Change | ccgtaagaattatacccccNNNggttccttacatgtggaag |
| Mfm1-5         | For mutagenesis by Quik-Change | ccgtaagaattataccccaagNNNccttacatgtggaag   |
| Mfm1-6         | For mutagenesis by Quik-Change | ccgtaagaattataccccaaggttNNNtacatgtggaag   |
| Mfm1-7         | For mutagenesis by Quik-Change | ccgtaagaattataccccaaggttcctNNNatgtggaag   |
| Mfm1-8         | For mutagenesis by Quik-Change | ccgtaagaattataccccaaggttcctacNNNtggaag    |
| Mfm1-9         | For mutagenesis by Quik-Change | ccgtaagNNNtataccccaaggttccttacatgtggaag   |
| Mfm1(F)        | For sequencing                 | ggaagcttgctgtgggatagcttg                  |
| Mfm1(R)        | For sequencing                 | gcaagcttgctctagtagcacagcgtatg             |
| Mfm2(F)        | For sequencing                 | cgtaggtattacaggaagat                      |
| Mfm2(R)        | For sequencing                 | cattggaaagtaaggcag                        |
| Mfm3(F)        | For sequencing                 | gtgtccaatggaataatcc                       |
| Mfm3(R)        | For sequencing                 | ggacctaaatctcaatcatc                      |
